# Supplementary material for: Satisfaction of academic medical staff with integrated medical curriculum: an exploratory multinational survey
Source: PubMed Central journal article supplement — BMC Med Educ. 2024 Dec 18;24:1483. doi: 10.1186/s12909-024-06468-x (PMC11656885; doi:10.1186/s12909-024-06468-x), 2024-12-18
Supplement: 12909_2024_6468_MOESM1_ESM.pdf [file 12909_2024_6468_MOESM1_ESM.pdf]

# Satisfaction of Academic Medical Staff with Integrated Medical Curriculum Questionnaire

## N.B:

- Your participation is valuable in advancing our understanding of medical education practices.
- All responses will be treated with the utmost confidentiality and will be used only for academic research purposes.

## (1) Demographic information and work characteristics of medical staff:

- 1- Age: <45 years ( ) ≥45 years ( )
- 2- Gender: Male ( ) Female ( )
- 3- Qualification: MBChB ( ) MSc. ( ) MD/PhD ( )
- 4- Nationality: -----
- 5- Affiliated university: Governmental ( ) Private ( )
- 6- Mention the university: -----
- 7- Teaching experience in conventional curriculum: ≤10 years ( ) >10 years ( )
- 8- Teaching experience in integrated curriculum: ≤10 years ( ) >10 years ( )

## (2) Satisfaction of medical staff with the integrated curriculum:

### A- Satisfaction with design of the integrated curriculum:

- 1- Awareness of latest contents: Satisfied ( ) Unsatisfied ( ) Unknown ( )
- 2- Nationally oriented curriculum: Satisfied ( ) Unsatisfied ( ) Unknown ( )
- 3- Internationally oriented curriculum: Satisfied ( ) Unsatisfied ( ) Unknown ( )
- 4- Integration of basic with clinical sciences: Satisfied ( ) Unsatisfied ( ) Unknown ( )
- 5- Integration of basic medical sciences: Satisfied ( ) Unsatisfied ( ) Unknown ( )
- 6- Integration of clinical sciences: Satisfied ( ) Unsatisfied ( ) Unknown ( )

**B- Satisfaction with implementation of the integrated curriculum:**

- 1- Mandatory faculty's training: Satisfied ( ) Unsatisfied ( ) Unknown ( )
- 2- Continuous efforts for curricular adjustment: Satisfied ( ) Unsatisfied ( ) Unknown ( )
- 3- Learning resources: Satisfied ( ) Unsatisfied ( ) Unknown ( )
- 4- Assessment methods: Satisfied ( ) Unsatisfied ( ) Unknown ( )
- 5- Students performance in integration: Satisfied ( ) Unsatisfied ( ) Unknown ( )
- 6- Implementation schedule: Satisfied ( ) Unsatisfied ( ) Unknown ( )

**Thank you**
